# Supplementary material for: COVID-19 Community Incidence and Associated Neighborhood-Level Characteristics in Houston, Texas, USA
Source: PubMed Central journal article supplement (PMC7915818; doi:10.3390/ijerph18041495), 2021-02-04
Supplement: ijerph-18-01495-s001.pdf [file ijerph-18-01495-s001.pdf]

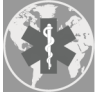

**Supplementary Table S1.** Variables used for the ADI. A total 17 census variables drawn from four major categories, including: poverty, housing, employment, and education.

| <b>Poverty</b>    |                                                             |
|-------------------|-------------------------------------------------------------|
| 1                 | Median family income, \$                                    |
| 2                 | Income disparity                                            |
| 3                 | Families below poverty level                                |
| 4                 | % population below 150% poverty threshold                   |
| 5                 | % Single parent households with dependents <18              |
| 6                 | % Households without a motor vehicle                        |
| 7                 | % Households without a telephone                            |
| 8                 | % Occupied housing units without complete plumbing          |
| <b>Housing</b>    |                                                             |
| 9                 | % Owner occupied housing units                              |
| 10                | % Households with >1 person per room                        |
| 11                | Median monthly mortgage, \$                                 |
| 12                | Median gross rent, \$                                       |
| 13                | Median home value, \$                                       |
| <b>Employment</b> |                                                             |
| 14                | % Employed person 16+ in white collar occupation            |
| 15                | % Civilian labor force unemployed (age 16+)                 |
| <b>Education</b>  |                                                             |
| 16                | % Population aged 25+ with <9year education                 |
| 17                | % Population aged 25+ with at least a high school education |
